# Supplementary material for: A Survey of Vaccine-Induced Measles IgG Antibody Titer to Verify Temporal Changes in Response to Measles Vaccination in Young Adults
Source: MDPI journal article supplement (doi:10.3390/vaccines7030118), 2019-09-19
Supplement: s1 [file s1]

Measles-specific IgG titer

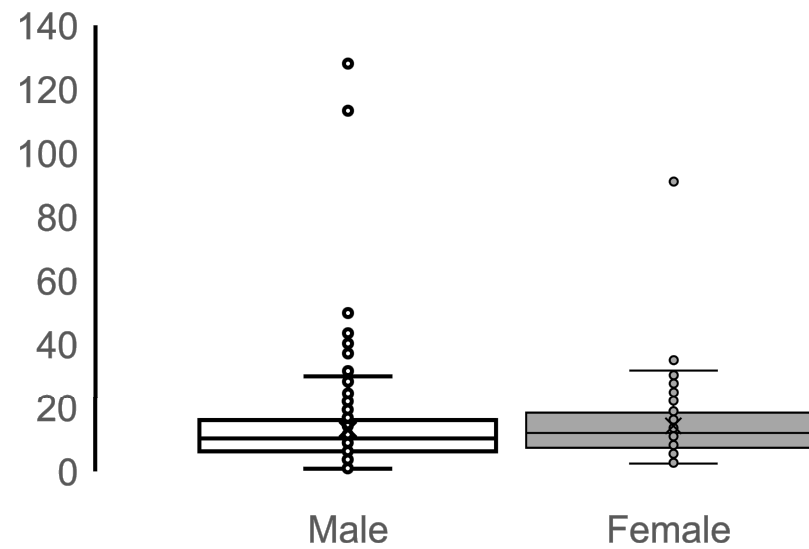

**Supplementary figure 1.** Distribution of measles-specific IgG antibody titer sorted by male and female. There were no significant differences between male and female ( $P \geq 0.05$ )

Measles-specific IgG titer

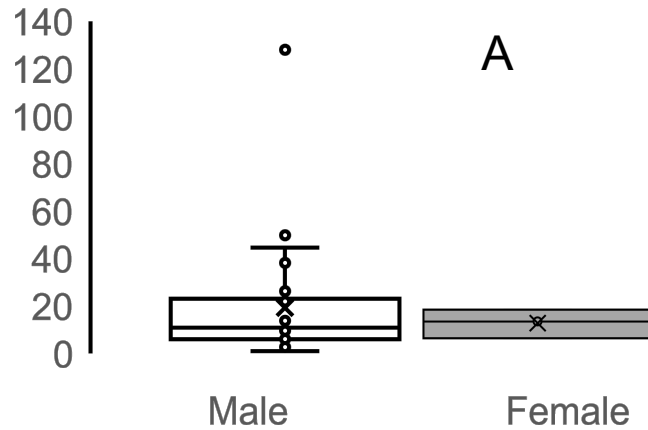

Measles-specific IgG titer

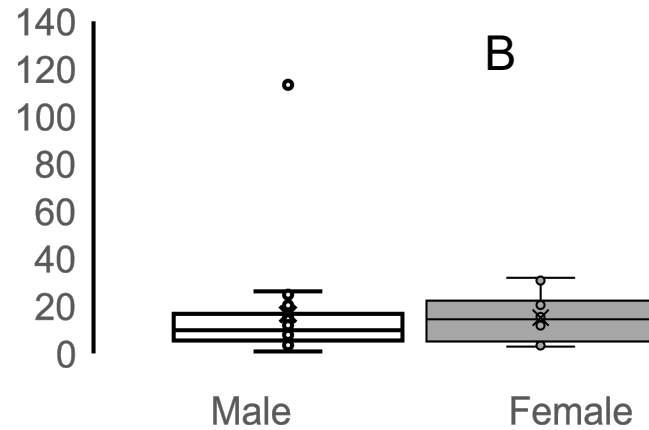

Measles-specific IgG titer

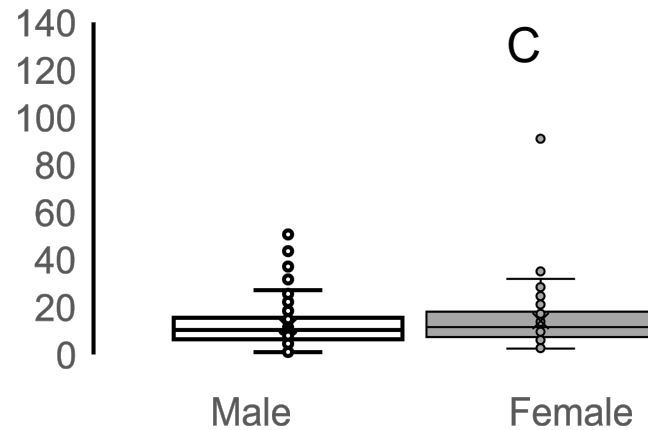

Measles-specific IgG titer

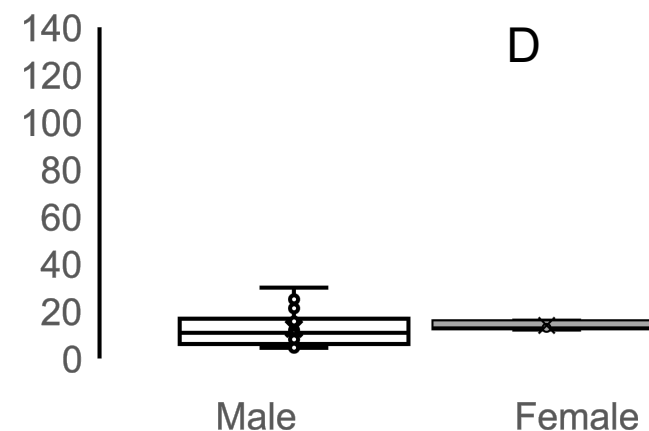

**Supplementary figure 2.** Distribution of measles-specific IgG antibody titer among the number of vaccinations sorted by male and female. A: Unvaccinated participants, B: One dose, C: Two doses, D: Three doses. There were no significant differences between male and female in all numbers of vaccinations ( $P \geq 0.05$ ).

Measles-specific IgG titer

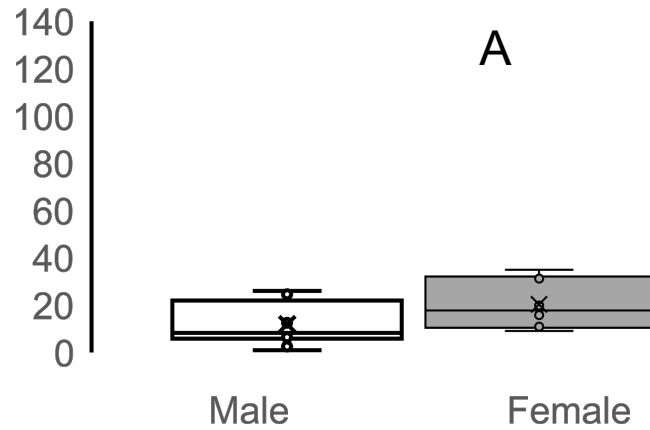

Measles-specific IgG titer

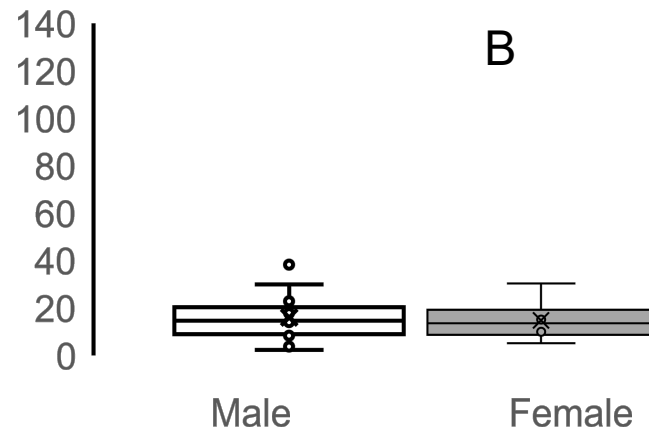

Measles-specific IgG titer

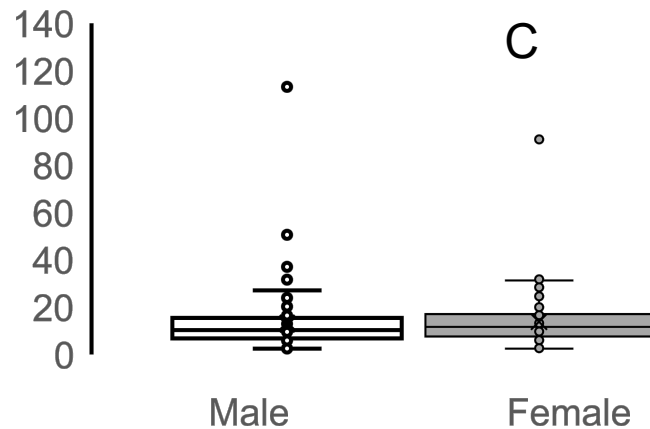

Measles-specific IgG titer

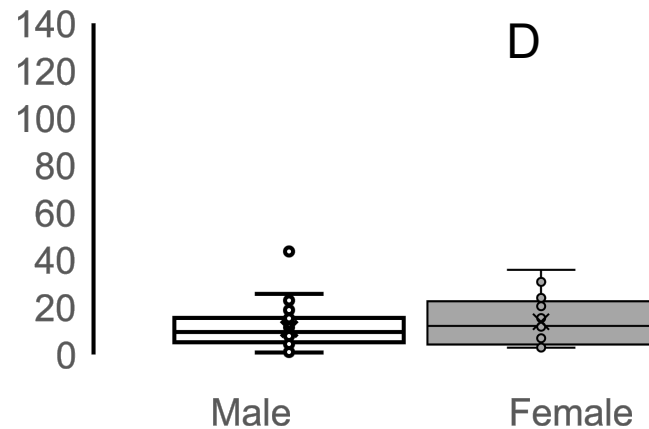

**Supplementary figure 3.** Distribution of measles-specific IgG antibody titer among four elapsed periods after last vaccinations (in months) sorted by male and female. A:  $\leq 12$ , B: 13 - 60, C: 61 - 72, D:  $\geq 73$ . There were no significant differences between male and female in all numbers of vaccinations ( $P \geq 0.05$ ).
